# Supplementary material for: Proton gradients across the coral calcifying cell layer: Effects of light, ocean acidification and carbonate chemistry
Source: Frontiers journal article supplement (doi:10.3389/fmars.2022.973908), 2022-09-23
Supplement: Table_1.DOCX [file Table_1.DOCX]

**Seawater acidification experiments: carbonate chemistry**

Details of seawater acidification experiments were published in Venn et al. 2019. Seawater pH and carbonate chemistry were controlled with CO2 bubbling in the pH 7.2, 7.4 and 7.8 treatments and bubbling with CO2 free air in the pH 8 treatment. pH electrodes (Ponsel-Mesure, France) which monitored pH and temperature continuously, and controlled CO2 bubbling rates and heating elements. Additionally, weekly pH measurements were also made using the indicator dye m-cresol purple (Acros 199250050) adapted from Dickson et al. 2007; the absorbance was measured using a spectrophotometer (UVmc2; Safas, Monaco). Weekly measurements of total alkalinity (TA) were made according to protocols described in Dickson et al. 2007. TA was measured via titration with 0.03 N HCl containing 40 g NaCl l−1 using a Metrohm Titrando 888 Dosimat controlled by Tiamo software to perform automated titrations of 4-mL samples, and alkalinity was calculated using a regression routine based on Department of Energy guidelines Dickson and Goyet 1994. For each sample run, certified seawater reference material supplied by the laboratory of A. G. Dickson (Scripps Institution of Oceanography, La Jolla, CA) was used to verify acid normality. Parameters of carbonate seawater chemistry were calculated from total scale pH, TA, temperature, and salinity using the free-access CO2SYS package (Pierrot et al. 2006) using constants from Mehrbach et al. 1973 as refit by Dickson and Millero 1987. Mean values and standard errors of parameters of carbonate seawater chemistry in each treatment are given in Table S1.

**Table S1. Carbonate chemistry parameters in the four experimental pH treatments (Venn et al. 2019). (Means ± SD). TA = Total alkalinity. TC = total dissolved inorganic carbon. Parameters of carbonate seawater chemistry were calculated from measured total scale pH (pHT), TA, temperature (25oC), and salinity 38.**

| Treatment | Tank | TA | pHT | TC | pCO2 | HCO3- | CO32- | Ω*ar* |
| --- | --- | --- | --- | --- | --- | --- | --- | --- |
| (µmol/kg-SW) |  | (µmol/kg-SW) | (µatm) | (µmol/kg-SW) | (µmol/kg-SW) |  |
|  |  |  |  |  |  |  |  |  |
| pH 8.0 | 1 | 2438.57 | 8.03 | 2105.15 | 415.91 | 1856.63 | 236.93 | 3.68 |
|  |  | ± 9.81 | ± 0.01 | ± 2.94 | ± 8.99 | ± 1.62 | ± 4.81 | ±0.07 |
| pH 8.0 | 2 | 2433.7 | 8.03 | 2100.58 | 414.72 | 1852.48 | 236.55 | 3.67 |
|  |  | ± 8.45 | ± 0.01 | ± 1.59 | ± 9.44 | ± 2.90 | ± 4.75 | ±0.07 |
| pH 7.8 | 3 | 2438.43 | 7.83 | 2221.28 | 725.37 | 2037.47 | 163.6 | 2.54 |
|  |  | ± 6.69 | ± 0.01 | ± 1.83 | ± 14.58 | ± 0.96 | ± 3.20 | ±0.05 |
| pH 7.8 | 4 | 2437.13 | 7.79 | 2242.44 | 816.67 | 2069.73 | 149.95 | 2.33 |
|  |  | ± 6.93 | ± 0.01 | ± 3.39 | ± 11.51 | ± 1.37 | ± 2.35 | ±0.04 |
| pH 7.4 | 5 | 2458.32 | 7.45 | 2401.39 | 1923.08 | 2271.13 | 76.67 | 1.19 |
|  |  | ± 5.72 | ± 0.02 | ± 1.09 | ± 80.61 | ± 2.05 | ± 3.21 | ±0.05 |
| pH 7.4 | 6 | 2459.39 | 7.42 | 2415.76 | 2104.62 | 2286.13 | 70.99 | 1.1 |
|  |  | ± 5.67 | ± 0.01 | ± 1.42 | ± 54.32 | ± 0.99 | ± 1.94 | ±0.03 |
| pH 7.2 | 7 | 2462.29 | 7.25 | 2479.63 | 3172.89 | 2341.81 | 49.41 | 0.77 |
|  |  | ± 6.83 | ± 0.01 | ± 2.72 | ± 77.57 | ± 3.49 | ± 1.39 | ±0.02 |
| pH 7.2 | 8 | 2463.76 | 7.22 | 2490.73 | 3378.78 | 2349.87 | 46.72 | 0.73 |
|  |  | ± 5.76 | ± 0.01 | ± 2.20 | ± 71.13 | ± 3.05 | ± 1.13 | ±0.02 |

**References**

Dickson, A. G., Sabine, C. L. & Christian, J. R. Guide to Best Practices for Ocean CO2 Measurements. 191 (2007)

Dickson, A. G. & Goyet, C. eds Handbook of methods for the analysis of the various parameters of the carbon dioxide system in sea water. Version 2, https://doi.org/10.2172/10107773 (1994).

Dickson, A. G. & Millero, F. J. A comparison of the equilibrium-constants for the dissociation of carbonic-acid in seawater media. Deep Sea Res. A 34, 1733–1743 (1987).

Mehrbach, C., Culberso, C. H., Hawley, J. E. & Pytkowic, R. M. Measurement of apparent dissociation constants of carbonic-acid in seawater at atmospheric pressure. Limnol. Oceanogr. 18, 897–907 (1973).

Pierrot, D. E., Lewis, D. W. & Wallace, R. MS Excel Program Developed for CO2 System Calculations. Carbon Dioxide Information Analysis Center, Oak Ridge National Laboratory, U.S. Department of Energy, Oak Ridge, Tennessee. https://doi.org/10.3334/CDIAC/ otg.CO2SYS_XLS_CDIAC105a (2006).

Venn, A. A. et al. Effects of light and darkness on pH regulation in three coral species exposed to seawater acidification. Sci. Rep. 9, 2201 (2019).
